# Supplementary material
Source: PubMed Central journal article supplement (PMC2841912)
Supplement: 0912226107_pnas.0912226107_SI.pdf [file 0912226107_pnas.0912226107_SI.pdf]

# Supporting Information

Buhrman et al. 10.1073/pnas.0912226107

## SI Text

**Hydrogen Bonding Network Involving Q61 and Y32 in the Ordered Active Site.** In addition to interacting with the side chain of E62 through W176, the side chain of Q61 H-bonds to the active site water molecule, W189, through its other lone pair electrons. Water molecule W176 also links Q61 to the side chain of R68 as well as to helix 3 residues D92 and Y96 through an H-bonding network involving W9, W28, and W367 (Fig. S1). While the side chain of Q61 is involved in this network, its carbonyl group is bridged to the side chain of R68 through water molecule W372.

Due to resonance stabilization involving the aromatic ring, the Y32 hydroxyl oxygen atom has its two lone pairs confined to the plane of the ring. Thus, in addition to its interaction with the active site bridging water molecule W189, it is involved in an H-bonding network through which it is linked to the side chain of N86 at the beginning of helix 3. The C-terminal end of helix 3 is at the center of the allosteric switch. This network is shown in detail in Fig. S1.

**Structure of RasY32F-GppNHp.** Fig. S2 shows two of the three molecules in the asymmetric unit found in the structure of RasY32F-GppNHp. In one of the monomers, shown in blue in Fig. S2, both active site water molecules are present. They appear to be due to the correct placement of T35, which in the other two monomers is flipped out of the active site. The third molecule in the asymmetric unit does not overlap either of the other two, but has similar characteristics to the monomer shown in maroon with respect to its relationship to the active site.

**Raf Binds to RasY32F-GppNHp but not to RasY32F-GDP.** In order to determine whether Raf binds to the RasY32F mutant in a nucleotide-dependent manner, we used Raf-RBD-CRD, a construct of Raf that includes both the RBD and CRD Ras-binding domains. This construct, containing residues 52–184 of Raf fused at the N terminus to a 56-residue immunoglobulin-binding domain of streptococcal protein G (GB1 domain) (1) was used for all experiments involving Raf. GB1-Raf-RBD-CRD (52–184) was cloned into the pET21a vector (Novagen) using NdeI and EcoRI restriction sites (NE Biolabs). The fusion protein increases protein expression and solubility, and we have shown previously that it does not interfere with binding wild-type Ras (2). The plasmid was transformed into BL21 cells for protein expression. Cells were grown in LB in the presence of ampicillin and induced with 1.0 mM IPTG in the presence of 200  $\mu$ M ZnCl<sub>2</sub>. Pellets were stored at –80°C. Pellets were resuspended in 20 mM Hepes (pH 7.0), lysed, and the protein was purified using cation exchange chromatography in a HiLoad 26/10 SP sepharose column (Amersham Pharmacia). The Raf-containing fractions were concentrated to less than 10 mL and further purified using a HiPrep 26/60 S200 gel filtration column (50 mM Tris, pH 7.0). GB1-Raf-RBD-CRD was concentrated to 2–5 mg/mL and stored as frozen aliquots at –80°C.

For the binding experiments Raf-RBD-CRD was incubated in a 1:1 molar ratio with either RasY32F-GppNHp or RasY32F-GDP at a concentration of 10  $\mu$ M and analyzed by gel filtration chromatography. Each protein solution was in a total of 2 mL buffer consisting of 50 mM Tris pH 7.5, 1 mM DTT, 50 mM NaCl, and 1 mM MgCl<sub>2</sub>. After 30 min, the samples were run on a cold S-100 column, preequilibrated in the buffer solution plus 10% glycerol. Fig. S3A shows the elution profile for the RasY32F-GppNHp/Raf-RBD-CRD, and Fig. S3B shows RasY32F-GDP/Raf-RBD-CRD solutions superimposed on the elution profile of a solution containing

a 2:1 molar ratio of wild-type Ras-GppNHp and Raf-RBD-CRD. The Ras/Raf complex elutes as a peak at 52 mL, while free Ras and free Raf-RBD-CRD both elute at 62 mL. Both wild-type Ras-GppNHp and RasY32F-GppNHp form complexes with Raf, whereas their GDP-bound forms do not (Fig. S3).

**Hydrolysis Experiments for Ras and RasY32F in the Absence and Presence of Raf-RBD-CRD.** Ras protein was purified bound to GDP as described in *Materials and Methods*. The bound GDP was exchanged for  $\gamma$ -<sup>32</sup>P labeled GTP, following an exchange protocol adapted from Self and Hall (3). Ras-GDP (5  $\mu$ g) was incubated at 30°C for 15–20 min with 2  $\mu$ Ci of  $\gamma$ -<sup>32</sup>P GTP in an exchange buffer consisting of 50 mM Tris pH 7.5, 5 mM DTT, 50 mM NaCl, and 10 mM EDTA in a total volume of 50  $\mu$ L. Immediately after the incubation, the exchange reaction was chilled on ice. MgCl<sub>2</sub> was then added to a concentration of 1 mM, and the solution passed over a cold P-6 nucleotide-binding column preequilibrated in a hydrolysis buffer (50 mM Tris pH 7.5, 1 mM DTT, 50 mM NaCl). In control experiments with equivalent amounts of Raf (which does not bind GTP), radioactivity that passed through the desalting column was approximately 5% of the radioactivity in similar GTP-labeled Ras samples and was lower than background subtracted counts. Therefore, radioactivity that passes through the nucleotide-binding column is specifically bound to Ras, and the measured hydrolysis rate approximates single turn-over conditions.

Rates of intrinsic hydrolysis for wild-type Ras and RasY32F were obtained using  $\gamma$ -<sup>32</sup>P labeled GTP as previously published (4–6). In short, 2.5–3  $\mu$ g of Ras-GTP $\gamma$ -<sup>32</sup>P (or RasY32F-GTP $\gamma$ -<sup>32</sup>P) was incubated at 30°C with or without a stoichiometric amount of Raf-RBD-CRD in a total volume of 200–300  $\mu$ L, for a final concentration of approximately 400 nM RasGTP/Raf-RBD-CRD complex. At multiple time points, 25  $\mu$ L aliquots were removed from the reaction and the hydrolysis reaction quenched with 400  $\mu$ L of a precooled solution consisting of 5% activated charcoal, 0.2 M HCl, 1 mM NaH<sub>2</sub>PO<sub>4</sub>, and 20% EtOH. This causes the nucleotide-bound protein to precipitate and adsorb to the charcoal. The samples are then centrifuged at 10,000 rpm for 10 min in a tabletop centrifuge, leaving the supernatant containing <sup>32</sup>P labeled inorganic phosphate of the hydrolysis reaction. Next, 200  $\mu$ L of the supernatant solutions were added to scintillation vials containing 1.2 mL of liquid scintillation cocktail (ScintiVerse II from Fisher Scientific) and the <sup>32</sup>P<sub>i</sub> quantified by scintillation counting. The counts were converted to % hydrolysis by the formula: (count – initial count)/(final count – initial count)\*100. Fig. S4 shows the resulting plots of percent of hydrolysis vs. time fit to the equation  $y = A * \exp[-(x - x_0)/t_0] + C$  in Kaleidograph, following a method described by Shutes and Der (6).

**Data Collection and Structure Refinement.** Data collection and refinement statistics are presented in Table S1 for the five structures discussed in this article. Synchrotron data were collected at 100 K for wild-type Ras-GppNHp crystals grown in the presence of calcium acetate taken directly from the mother liquor and for the RasY32F-GppNHp mutant. The three datasets from crystals soaked in Ca(OAc)<sub>2</sub>, Mg(OAc)<sub>2</sub>, or backsoaked from Mg(OAc)<sub>2</sub> to Ca(OAc)<sub>2</sub> were collected at our home institution at 120 K on a MAR345 area detector mounted on a Rigaku RuH3R generator operating at 50 kV and 100 mA.

Data were processed using Denzo HKL or HKL2000 (7) and refined with PHENIX (8) and Coot (9).

- Huth JR, et al. (1997) Design of an expression system for detecting folded protein domains and mapping macromolecular interactions by NMR. *Protein Sci* 6(11): 2359–2364.
- Buhrman G, Wink G, Mattos C (2007) Transformation efficiency of RasQ61 mutants linked to structural features of the switch regions in the presence of Raf. *Structure* 15(12):1618–1629.
- Self AJ, Hall A (1995) Measurement of intrinsic nucleotide exchange and GTP hydrolysis rates. *Methods Enzymol* 256:67–76.
- Holden JL, et al. (1991) Rsr1 and Rap1 GTPases are activated by the same GTPase-activating protein and require threonine 65 for their activation. *J Biol Chem* 266(26): 16992–16995.
- Leupold CM, Goody RS, Wittinghofer A (1983) Stereochemistry of the elongation factor Tu X GTP complex. *Eur J Biochem* 135(2):237–241.
- Shutes A, Der CJ (2005) Real-time in vitro measurement of GTP hydrolysis. *Methods* 37(2):183–189.
- Otwinowski Z, Minor W (1997) Processing of x-ray diffraction data collected in oscillation mode. *Methods in Enzymology, Macromolecular Crystallography, Part A*, eds Carter CW & Sweet RM (Academic Press, New York), Vol 276, pp 307–326.
- Adams PD, et al. (2002) PHENIX: Building new software for automated crystallographic structure determination. *Acta Crystallogr, Sect D: Biol Crystallogr* D58:1948–1954.
- Emsley P, Cowtan K (2004) Coot: Model-building tools for molecular graphics. *Acta Crystallogr, Sect D: Biol Crystallogr* D60:2126–2132.

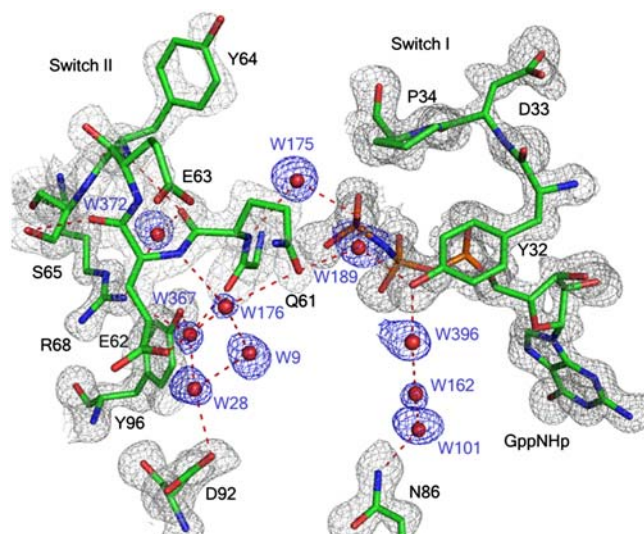

**Fig. S1.** Switch I and switch II in the well-ordered active site in Ras-GppNHp. The 2Fo-Fc electron density map drawn around protein atoms and the nucleotide is contoured at the  $1\sigma$  level and depicted in gray. The map showing the network of water molecules connecting switch II and the active site with helix 3 is contoured at the  $1.3\sigma$  level and depicted in blue for clarity. The residue numbers are given in the corresponding color scheme.

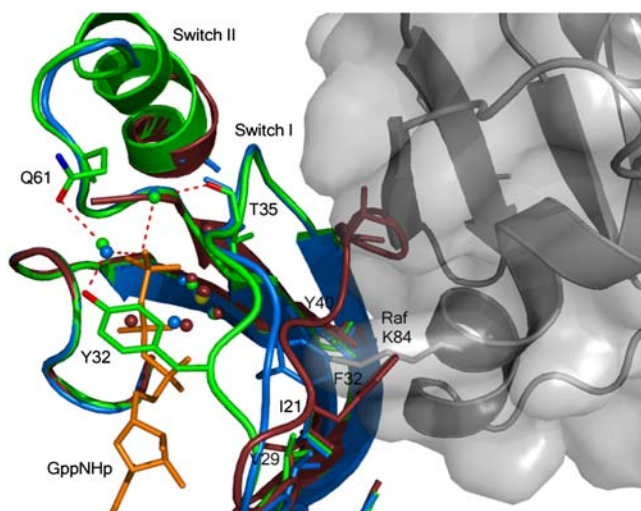

**Fig. S2.** Switch regions in RasY32F-GppNHp. Wild-type Ras-GppNHp with ordered switch II is shown in green with hydrogen bonds involving the catalytic and bridging water molecules depicted in red dashed lines. Two of the three models in the asymmetric unit of the mutant, superimposed on the wild type by least squares fit of the nucleotide atoms, are colored as follows: Chain A is in blue and Chain C is in maroon. Chain B is omitted for clarity, but it also occludes the Raf-RBD binding pocket. Water molecules are shown as spheres and color-coded according to their corresponding protein models. The Raps/Raf-RBD complex (from PDB code 1GUA) was superimposed on our wild-type Ras-GppNHp structure, and the Raf-RBD model (without Raps) is depicted in gray to show its binding site on Ras.
